# Supplementary material for: Mineralocorticoid receptor interaction with SP1 generates a new response element for pathophysiologically relevant gene expression
Source: PubMed Central journal article supplement — Nucleic Acids Res. 2013 Jul 1;41(17):8045–60. doi: 10.1093/nar/gkt581 (PMC3783164; doi:10.1093/nar/gkt581), 2013-07-01
Supplement: supp_gkt581_nar-00048-v-2013-File015.pdf [file supp_gkt581_nar-00048-v-2013-File015.pdf]

## Supplement 1

### Primers

#### transcription factor binding ELISA

|           |                                                                                   |
|-----------|-----------------------------------------------------------------------------------|
| MRE1sense | 5'-Biotin- CGC CTG GTC CCT CCT CCT CCC GCC CTG CCT CCC CGC GCC TCG GCC CGC GC-3'  |
| MRE1 anti | 5'- Biotin-CTC GGG ACT CCG GCC GCC TCG GCC GCG GCG GGC GCT CAC ACC GTG CGG GG -3' |
| GRE sense | 5'-Biotin CTAGCGGTACATTTTGTCTAGAAC-3'                                             |
| GRE anti  | 5'-Biotin- GTTCTAGAACAAAATGTACCGCTAG-3'                                           |
| eNOS for  | 5'-Biotin-GAC CCT CAC CGC TAC AAC AT-3'                                           |
| eNOS back | 5'-Biotin-ATG TTG TAG CGG TGA GGG TC-3'                                           |

#### electromobility shift assay

|                      |                                                              |
|----------------------|--------------------------------------------------------------|
| MRE1.3 sense         | 5'-Biotin-CGTACCGCAGCAGCCTCCTCC-3'                           |
| MRE1.3anti           | 5'-Biotin-GTCGGGACTCCGGCCGCCTCGGCCGCGGGCGCTCACACCGTGCAGGG-3' |
| CRE sense            | 5'-Biotin-GCACCAGACAGTGACGTGAGCTGCCAGAT-3'                   |
| CRE65bp anti         | 5'-Biotin-GGTGTCTGAAAGACGTACAG-3'                            |
| MRE1.3a-(25bp)-sense | 5'-Biotin- GCAGCAGCCTCCTCCCCCGCACGG-3'                       |
| MRE1.3a-(25 bp)-anti | 5'-Biotin- CCGTGCGGGGGGAGGAGGCTGCTGC-3'                      |
| Bio-SP1 cons sense   | 5'-Biotin- ATTCGATCGGGGCGGGGCGAGC                            |
| Bio-SP1cons anti     | 5'-Biotin- GCTCGCCCCGCCCCGATCGAAT                            |

## qPCR

|                                                                   |                 |                                 |
|-------------------------------------------------------------------|-----------------|---------------------------------|
| <b>RNase K</b> (Ribonuclease kappa)                               | RNaseK for      | AATGTCCATTCCGCTGTGTT            |
|                                                                   | RNaseK back     | AGCGCACCATGTATTCCTTG            |
| <b>Netrin 4</b> (netrin 4 precursor)                              | netrin 4 for    | CCAGTCCTTTTCCATGCACT            |
|                                                                   | netrin 4 back   | GCTGCCCTTGACAATGAAAT            |
| <b>ST3Gal2</b> (ST3 beta-galactoside alpha-2,3-sialyltransferase) | ST3Gal2 forw    | ACG TCC AGA GGT GGT GGA TG      |
|                                                                   | ST3Gal2 back    | CTC ATG ATG AAG TTG TGC CCG T   |
| <b>TARDBP</b> (TAR DNA binding protein)                           | TARDBP for      | TGT ATG TTG TCA ACT ATC CAA AAG |
|                                                                   | TARDBP back     | CTG CAC CAT AAG AAC TTC TCC A   |
| <b>HDGF</b> (Hepatoma-derived growth factor isoform a)            | HDGF for        | CCAAGGAGAAGTTTGGCAAG            |
|                                                                   | HDGF back       | TTCAACGCTCCTTTCTCGTT            |
| <b>SPTBN1</b> (Spectrin beta (non-erythrocytic))                  | SPTBN1 forward  | CCCAGACAAAGGCCAGCGG             |
|                                                                   | SPTBN1 reverse  | ACGGTGAGGCGCTTGCTGTC            |
| <b>PPP1R7</b> (Protein Phosphatase 1 Untereinheit 7)              | PPP1R7 forward  | CACGATGTTGGACATTGCAT            |
|                                                                   | PPP1R7 reverse  | GCTCCAGCTCTCAAGGAGATT           |
| <b>RanGAP1</b> (Ran GTPase activating protein 1)                  | RANGAP1 forward | GGCCTTAGAGAAGAAGTCGGA           |
|                                                                   | RANGAP1 reverse | GCTTAAGTCCAGCTCCACCA            |
| <b>UBE2B</b> (Ubiquitin-conjugating enzyme E2B)                   | UBE2B forward   | TCCAAAATGTTTCATCCAAATG          |
|                                                                   | UBE2B reverse   | ATTCGGTTCATCCAGCAGAG            |
| <b>GPR64</b> (G protein-coupled receptor 64. isoform 1)           | GPR64 forward   | ACCAGCGCACCTCCTGTCCA            |
|                                                                   | GPR64 reverse   | TTGAGCCAGAGGGGCCAGCA            |

## Supplement 2

|            |                          |                                                            |
|------------|--------------------------|------------------------------------------------------------|
| uc001art.2 | chr1:11072429-11073784   | TAR DNA binding protein                                    |
| uc001fpy.3 | chr1:156721222-156721793 | hepatoma-derived growth factor isoform a                   |
| uc002rxu.2 | chr2:54683204-54753555   | spectrin, beta, non-erythrocytic 1 isoform 1               |
| uc002wav.1 | chr2:242092641-242097244 | protein phosphatase 1, regulatory subunit                  |
| uc002wcq.3 | chr2:242800991-242801308 | programmed cell death 1 precursor                          |
| uc003eqa.3 | chr3:133748647-133749170 | solute carrier organic anion transporter family member 2A1 |
| uc011byf.1 | chr4:37978780-37979120   | TBC1 (tre-2/USP6, BUB2, cdc16) domain family,              |
| uc003kuc.2 | chr5:126112583-126113200 | lamin B1                                                   |
| uc003kzh.2 | chr5:133706620-133707286 | ubiquitin-conjugating enzyme E2B                           |
| uc003zhc.2 | chr9:2015092-2029022     | SWI/SNF-related matrix-associated                          |
| uc004cyx.2 | chrX:19086953-19140927   | G protein-coupled receptor 64 isoform 1                    |
| uc004eqz.2 | chrX:118110045-118112414 | LON peptidase N-terminal domain and ring finger            |
| uc001jjv.1 | chr10:56424023-57387952  | protocadherin 15 precursor                                 |
| uc001opf.2 | chr11:69518645-69519356  | fibroblast growth factor 19 precursor                      |
| uc001tei.2 | chr12:96184088-96184786  | netrin 4 precursor                                         |
| uc010tvb.1 | chr14:75894670-75904623  | Jun dimerization protein 2 isoform a                       |
| uc010tw.1  | chr14:92909459-92913763  | solute carrier family 24 member 4 isoform 3                |
| uc002eyx.2 | chr16:70432434-70473241  | ST3 beta-galactoside alpha-2,3-sialyltransferase           |
| uc002gea.2 | chr17:6915548-6916002    | ribonuclease kappa                                         |
| uc002kom.3 | chr18:10454375-10454978  | adenomatosis polyposis coli down-regulated 1               |
| uc002yfr.1 | chr20:62284699-62285030  | SCG10-like-protein                                         |
| uc003azt.2 | chr22:41677049-41682219  | Ran GTPase activating protein 1                            |

Semi-global alignments of MRE1.3'' with promoter regions of the human genome; listed are promoters of known genes with a ratio of -0.81.
